# Supplementary material for: Highly selective electroreduction of nitrate to ammonia on a Ru-doped tetragonal Co2P monolayer with low-limiting overpotential
Source: Royal Society of Chemistry journal article supplement (doi:10.1039/d1cy01217g), 2021-01-01
Supplement: d1cy01217g1.pdf [file d1cy01217g1.pdf]

## Supporting Information

# Highly selective electroreduction of nitrate to ammonia on Ru-doped tetragonal Co<sub>2</sub>P monolayer with low-limiting overpotential

Jie Wu and Yang-Xin Yu\*

*Laboratory of Chemical Engineering Thermodynamics, Department of Chemical Engineering, Tsinghua University, Beijing 100084, People's Republic of China*

\*Corresponding author.

E-mail: yangxyu@mail.tsinghua.edu.cn

Phone: +86-10-62782558

Fax: +86-10-62770304

**Table S1.** Average energy difference (eV) between ferromagnetic and antiferromagnetic states.

| Materials         | $E_{\text{AFM1}} - E_{\text{FM}}$ | $E_{\text{AFM2}} - E_{\text{FM}}$ | $E_{\text{AFM3}} - E_{\text{FM}}$ | $E_{\text{AFM4}} - E_{\text{FM}}$ |
|-------------------|-----------------------------------|-----------------------------------|-----------------------------------|-----------------------------------|
| Co <sub>2</sub> P | 0.476                             | 0.135                             | 0.180                             | 0.107                             |
| Ni <sub>2</sub> P | 0                                 | 0                                 | 0                                 | 0                                 |
| Ru <sub>2</sub> P | 0                                 | 0                                 | 0                                 | 0                                 |
| Pd <sub>2</sub> P | 0                                 | 0                                 | 0                                 | 0                                 |

**Table S2** Optimized structures of possible products for each elementary step along the NO<sub>3</sub>RR process on the Co<sub>2</sub>P monolayer and their relative energies to the most stable configuration.

| Intermediates                  | Structures and relative energies                                                    |                                                                                     |                                                                                       |
|--------------------------------|-------------------------------------------------------------------------------------|-------------------------------------------------------------------------------------|---------------------------------------------------------------------------------------|
| NO <sub>3</sub> H <sub>2</sub> | 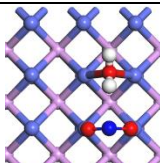   |    |    |
|                                | $\Delta E = 0.00$ eV                                                                | $\Delta E = 0.17$ eV                                                                | $\Delta E = 0.19$ eV                                                                  |
|                                |                                                                                     |                                                                                     |                                                                                       |
| NO <sub>2</sub> H              |    |    |                                                                                       |
|                                | $\Delta E = 0.00$ eV                                                                | $\Delta E = 0.08$ eV                                                                |                                                                                       |
| NO <sub>2</sub> H <sub>2</sub> |   |   |                                                                                       |
|                                | $\Delta E = 0.00$ eV                                                                | $\Delta E = 0.67$ eV                                                                |                                                                                       |
| NO <sub>2</sub> H <sub>3</sub> |  |  |  |
|                                | $\Delta E = 0.00$ eV                                                                | $\Delta E = 0.73$ eV                                                                | $\Delta E = 0.10$ eV                                                                  |
|                                |                                                                                     |                                                                                     |                                                                                       |
| NOH <sub>2</sub>               |  |  |                                                                                       |
|                                | $\Delta E = 0.00$ eV                                                                | $\Delta E = 0.70$ eV                                                                |                                                                                       |
| NOH <sub>3</sub>               |  |  |                                                                                       |
|                                | $\Delta E = 0.00$ eV                                                                | $\Delta E = 0.31$ eV                                                                |                                                                                       |
| NOH <sub>4</sub>               |  |  |                                                                                       |
|                                | $\Delta E = 0.00$ eV                                                                | $\Delta E = 0.54$ eV                                                                |                                                                                       |



**Table S3** Optimized structures of various possible products for each elementary step along the  $\text{NO}_3\text{RR}$  process on the  $\text{Ni}_2\text{P}$  monolayer and their relative energies referred to the most stable configuration.

| Intermediates           | Structures and relative energies                                                                                    |                                                                                                                     |                                                                                                                      |
|-------------------------|---------------------------------------------------------------------------------------------------------------------|---------------------------------------------------------------------------------------------------------------------|----------------------------------------------------------------------------------------------------------------------|
| $\text{NO}_3\text{H}_2$ | 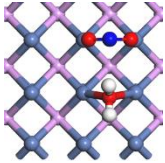<br>$\Delta E = 0.00 \text{ eV}$   | <br>$\Delta E = 0.42 \text{ eV}$   | <br>$\Delta E = 0.47 \text{ eV}$  |
| $\text{NO}_2\text{H}$   | <br>$\Delta E = 0.00 \text{ eV}$   | <br>$\Delta E = 0.08 \text{ eV}$   |                                                                                                                      |
| $\text{NO}_2\text{H}_2$ | <br>$\Delta E = 0.00 \text{ eV}$   | <br>$\Delta E = 1.54 \text{ eV}$   |                                                                                                                      |
| $\text{NO}_2\text{H}_3$ | <br>$\Delta E = 0.00 \text{ eV}$  | <br>$\Delta E = 0.50 \text{ eV}$  | <br>$\Delta E = 0.18 \text{ eV}$ |
| $\text{NOH}_2$          | <br>$\Delta E = 0.00 \text{ eV}$ | <br>$\Delta E = 0.64 \text{ eV}$ |                                                                                                                      |
| $\text{NOH}_3$          | <br>$\Delta E = 0.00 \text{ eV}$ | <br>$\Delta E = 0.42 \text{ eV}$ |                                                                                                                      |
| $\text{NOH}_4$          | <br>$\Delta E = 0.00 \text{ eV}$ | <br>$\Delta E = 0.63 \text{ eV}$ |                                 |

**Table S4** Optimized structures of various possible products for each elementary step along the  $\text{NO}_3\text{RR}$  process on the  $\text{Ru}_2\text{P}$  monolayer and their relative energies referred to the most stable configuration.

| Intermediates           | Structures and relative energies                                                                                    |                                                                                                                     |                                                                                                                      |
|-------------------------|---------------------------------------------------------------------------------------------------------------------|---------------------------------------------------------------------------------------------------------------------|----------------------------------------------------------------------------------------------------------------------|
| $\text{NO}_3\text{H}_2$ | 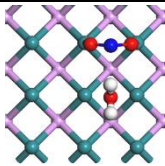<br>$\Delta E = 0.00 \text{ eV}$   | <br>$\Delta E = 0.20 \text{ eV}$   | <br>$\Delta E = 0.27 \text{ eV}$  |
| $\text{NO}_2\text{H}$   | <br>$\Delta E = 0.00 \text{ eV}$   | <br>$\Delta E = 0.14 \text{ eV}$   |                                                                                                                      |
| $\text{NO}_2\text{H}_2$ | <br>$\Delta E = 0.00 \text{ eV}$   | <br>$\Delta E = 2.15 \text{ eV}$   |                                                                                                                      |
| $\text{NO}_2\text{H}_3$ | <br>$\Delta E = 0.00 \text{ eV}$  | <br>$\Delta E = 0.51 \text{ eV}$  | <br>$\Delta E = 0.07 \text{ eV}$ |
| $\text{NOH}_2$          | <br>$\Delta E = 0.00 \text{ eV}$ | <br>$\Delta E = 0.67 \text{ eV}$ |                                                                                                                      |
| $\text{NOH}_3$          | <br>$\Delta E = 0.00 \text{ eV}$ | <br>$\Delta E = 3.15 \text{ eV}$ |                                                                                                                      |
| $\text{NOH}_4$          | <br>$\Delta E = 0.00 \text{ eV}$ | <br>$\Delta E = 0.54 \text{ eV}$ |                                 |

**Table S5** Optimized structures of various possible products for each elementary step along the NO<sub>3</sub>RR process on the Pd<sub>2</sub>P monolayer and their relative energies referred to the most stable configuration.

| Intermediates                  | Structures and relative energies                                                    |                                                                                      |
|--------------------------------|-------------------------------------------------------------------------------------|--------------------------------------------------------------------------------------|
| NO <sub>3</sub> H <sub>2</sub> | 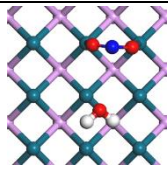   |    |
|                                | $\Delta E = 0.00$ eV                                                                | $\Delta E = 0.78$ eV                                                                 |
| NO <sub>2</sub> H              |    |    |
|                                | $\Delta E = 0.00$ eV                                                                | $\Delta E = 0.10$ eV                                                                 |
| NO <sub>2</sub> H <sub>2</sub> |    |    |
|                                | $\Delta E = 0.00$ eV                                                                | $\Delta E = 1.70$ eV                                                                 |
| NO                             |   |   |
|                                | $\Delta E = 0.00$ eV                                                                | $\Delta E = 1.21$ eV                                                                 |
| NOH                            |  |  |
|                                | $\Delta E = 0.00$ eV                                                                | $\Delta E = 1.20$ eV                                                                 |
| NOH <sub>2</sub>               |  |  |
|                                | $\Delta E = 0.00$ eV                                                                | $\Delta E = 0.64$ eV                                                                 |
| NOH <sub>3</sub>               |  |  |
|                                | $\Delta E = 0.00$ eV                                                                | $\Delta E = 0.27$ eV                                                                 |
| NOH <sub>4</sub>               |  |  |
|                                | $\Delta E = 0.00$ eV                                                                | $\Delta E = 0.21$ eV                                                                 |

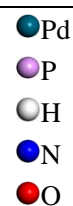

**Table S6** Calculated zero point energy (ZPE), entropy (TS) and enthalpy ( $\Delta H$ ) of different adsorption species on the  $\text{Co}_2\text{P}$  monolayer, where T is set to be 298.15 K and the \* denotes the adsorption site.

| Adsorption Species                 | $E_{\text{ZPE}}$ (eV) | TS (eV) | $\Delta H$ (eV) |
|------------------------------------|-----------------------|---------|-----------------|
| * $\text{NO}_3$                    | 0.4156                | 0.2243  | 0.0025          |
| * $\text{NO}_3\text{H}$            | 0.6593                | 0.2179  | 0.0038          |
| * $\text{NO}_2\text{-H}_2\text{O}$ | 0.9380                | 0.2921  | 0.0053          |
| * $\text{NO}_2$                    | 0.2882                | 0.1569  | 0.0018          |
| * $\text{NHO}_2$                   | 0.6032                | 0.1928  | 0.0034          |
| * $\text{NHO}_2\text{H}$           | 0.8158                | 0.2507  | 0.0046          |
| * $\text{NHO-H}_2\text{O}$         | 1.2182                | 0.1876  | 0.0064          |
| * $\text{NHO}$                     | 0.4931                | 0.1160  | 0.0027          |
| * $\text{NH}_2\text{O}$            | 0.8467                | 0.1264  | 0.0044          |
| * $\text{NH}_2\text{OH}$           | 1.1418                | 0.2075  | 0.0060          |
| * $\text{NH}_3\text{OH}$           | 1.4310                | 0.1704  | 0.0074          |
| * $\text{OH}$                      | 0.3686                | 0.0691  | 0.0020          |
| * $\text{H}_2\text{O}$             | 0.6679                | 0.1186  | 0.0036          |

**Table S7** Calculated zero point energy (ZPE), entropy (TS) and enthalpy ( $\Delta H$ ) of different adsorption species on the  $\text{Ni}_2\text{P}$  monolayer, where T is set to be 298.15 K and the \* denotes the adsorption site.

| Adsorption Species                 | $E_{\text{ZPE}}$ (eV) | TS (eV) | $\Delta H$ (eV) |
|------------------------------------|-----------------------|---------|-----------------|
| * $\text{NO}_3$                    | 0.4098                | 0.2518  | 0.0025          |
| * $\text{NO}_3\text{H}$            | 0.6471                | 0.2410  | 0.0038          |
| * $\text{NO}_2\text{-H}_2\text{O}$ | 0.9227                | 0.3318  | 0.0053          |
| * $\text{NO}_2$                    | 0.2790                | 0.1836  | 0.0018          |
| * $\text{NHO}_2$                   | 0.5991                | 0.2127  | 0.0034          |
| * $\text{NHO}_2\text{H}$           | 0.8422                | 0.1972  | 0.0046          |
| * $\text{NHO-H}_2\text{O}$         | 1.1343                | 0.2672  | 0.0062          |
| * $\text{NHO}$                     | 0.4836                | 0.1237  | 0.0027          |
| * $\text{NH}_2\text{O}$            | 0.8370                | 0.1436  | 0.0044          |
| * $\text{NH}_2\text{OH}$           | 1.0734                | 0.1349  | 0.0056          |
| * $\text{NH}_3\text{OH}$           | 1.4064                | 0.1961  | 0.0073          |
| * $\text{OH}$                      | 0.3583                | 0.0761  | 0.0019          |
| * $\text{H}_2\text{O}$             | 0.6407                | 0.1573  | 0.0035          |

**Table S8** Calculated zero point energy (ZPE), entropy (TS) and enthalpy ( $\Delta H$ ) of different adsorption species on the Ru<sub>2</sub>P monolayer, where T is set to be 298.15 K and the \* denotes the adsorption site.

| Adsorption Species                 | $E_{ZPE}$ (eV) | TS (eV) | $\Delta H$ (eV) |
|------------------------------------|----------------|---------|-----------------|
| *NO <sub>3</sub>                   | 0.4384         | 0.1884  | 0.0026          |
| *NO <sub>3</sub> H                 | 0.6518         | 0.2137  | 0.0037          |
| *NO <sub>2</sub> -H <sub>2</sub> O | 0.9605         | 0.2673  | 0.0054          |
| *NO <sub>2</sub>                   | 0.2771         | 0.1783  | 0.0018          |
| *NHO <sub>2</sub>                  | 0.5856         | 0.2266  | 0.0034          |
| *NHO <sub>2</sub> H                | 0.8594         | 0.1725  | 0.0046          |
| *NHO-H <sub>2</sub> O              | 1.2028         | 0.1896  | 0.0063          |
| *NHO                               | 0.5005         | 0.1024  | 0.0027          |
| *NH <sub>2</sub> O                 | 0.8473         | 0.1310  | 0.0044          |
| *NH <sub>2</sub> OH                | 1.1080         | 0.1235  | 0.0057          |
| *NH <sub>3</sub> OH                | 1.4575         | 0.1628  | 0.0075          |
| *OH                                | 0.3839         | 0.0534  | 0.0020          |
| *H <sub>2</sub> O                  | 0.6635         | 0.1438  | 0.0036          |

**Table S9** Calculated zero point energy (ZPE), entropy (TS) and enthalpy ( $\Delta H$ ) of different adsorption species on the Pd<sub>2</sub>P monolayer, where T is set to be 298.15 K and the \* denotes the adsorption site.

| Adsorption Species                 | $E_{ZPE}$ (eV) | TS (eV) | $\Delta H$ (eV) |
|------------------------------------|----------------|---------|-----------------|
| *NO <sub>3</sub>                   | 0.4074         | 0.2824  | 0.0026          |
| *NO <sub>3</sub> H                 | 0.6989         | 0.2793  | 0.0040          |
| *NO <sub>2</sub> -H <sub>2</sub> O | 0.9388         | 0.3408  | 0.0054          |
| *NO <sub>2</sub>                   | 0.2722         | 0.1961  | 0.0018          |
| *NO <sub>2</sub> H                 | 0.5480         | 0.2620  | 0.0033          |
| *NO-H <sub>2</sub> O               | 0.8936         | 0.2331  | 0.0049          |
| *NO                                | 0.1927         | 0.1432  | 0.0013          |
| *NHO                               | 0.4879         | 0.1138  | 0.0027          |
| *NH <sub>2</sub> O                 | 0.8373         | 0.1360  | 0.0044          |
| *NH <sub>2</sub> OH                | 1.1791         | 0.1550  | 0.0061          |
| *NH <sub>3</sub> OH                | 1.4681         | 0.1544  | 0.0075          |
| *OH                                | 0.3514         | 0.0891  | 0.0019          |
| *H <sub>2</sub> O                  | 0.6569         | 0.1456  | 0.0035          |

**Table S10** Optimized structures of various possible products for each elementary step along the NO<sub>3</sub>RR process on the Ru-doped Co<sub>2</sub>P monolayer and their relative energies referred to the most stable configuration.

| Intermediates                  | Structures and relative energies                                                                            |                                                                                                             |                                                                                                              |
|--------------------------------|-------------------------------------------------------------------------------------------------------------|-------------------------------------------------------------------------------------------------------------|--------------------------------------------------------------------------------------------------------------|
| NO <sub>3</sub> H <sub>2</sub> | 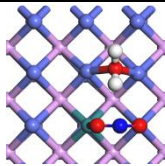<br>$\Delta E = 0.00$ eV   | <br>$\Delta E = 0.20$ eV   | <br>$\Delta E = 0.19$ eV  |
| NO <sub>2</sub> H              | <br>$\Delta E = 0.00$ eV   | <br>$\Delta E = 0.20$ eV   | <br>$\Delta E = 0.14$ eV  |
| NO <sub>2</sub> H <sub>2</sub> | <br>$\Delta E = 0.00$ eV   | <br>$\Delta E = 1.97$ eV   | <br>$\Delta E = 2.51$ eV  |
| NO <sub>2</sub> H <sub>3</sub> | <br>$\Delta E = 0.00$ eV  | <br>$\Delta E = 0.86$ eV  | <br>$\Delta E = 0.87$ eV |
| NOH <sub>2</sub>               | <br>$\Delta E = 0.00$ eV | <br>$\Delta E = 0.59$ eV |                                                                                                              |
| NOH <sub>3</sub>               | <br>$\Delta E = 0.00$ eV | <br>$\Delta E = 0.37$ eV |                                                                                                              |
| NOH <sub>4</sub>               | <br>$\Delta E = 0.00$ eV | <br>$\Delta E = 0.49$ eV |                         |



**Table S11** Calculated zero point energy (ZPE), entropy (TS) and enthalpy ( $\Delta H$ ) of different adsorption species on the Ru-doped Co<sub>2</sub>P monolayer, where T is set to be 298.15 K and the \* denotes the adsorption site.

| Adsorption Species                 | $E_{ZPE}$ (eV) | TS (eV) | $\Delta H$ (eV) |
|------------------------------------|----------------|---------|-----------------|
| *NO <sub>3</sub>                   | 0.4291         | 0.2035  | 0.0026          |
| *NO <sub>3</sub> H                 | 0.6604         | 0.2227  | 0.0038          |
| *NO <sub>2</sub> -H <sub>2</sub> O | 0.9494         | 0.2892  | 0.0053          |
| *NO <sub>2</sub>                   | 0.2990         | 0.1428  | 0.0018          |
| *NHO <sub>2</sub>                  | 0.6077         | 0.1868  | 0.0034          |
| *NHO <sub>2</sub> H                | 0.8514         | 0.2005  | 0.0047          |
| *NHO-H <sub>2</sub> O              | 1.1315         | 0.1816  | 0.0060          |
| *NHO                               | 0.4967         | 0.1118  | 0.0027          |
| *NH <sub>2</sub> O                 | 0.8501         | 0.1246  | 0.0044          |
| *NH <sub>2</sub> OH                | 1.1471         | 0.1535  | 0.0060          |
| *NH <sub>3</sub> OH                | 1.3964         | 0.2366  | 0.0073          |
| *OH                                | 0.3623         | 0.0679  | 0.0020          |
| *H <sub>2</sub> O                  | 0.6628         | 0.1531  | 0.0036          |

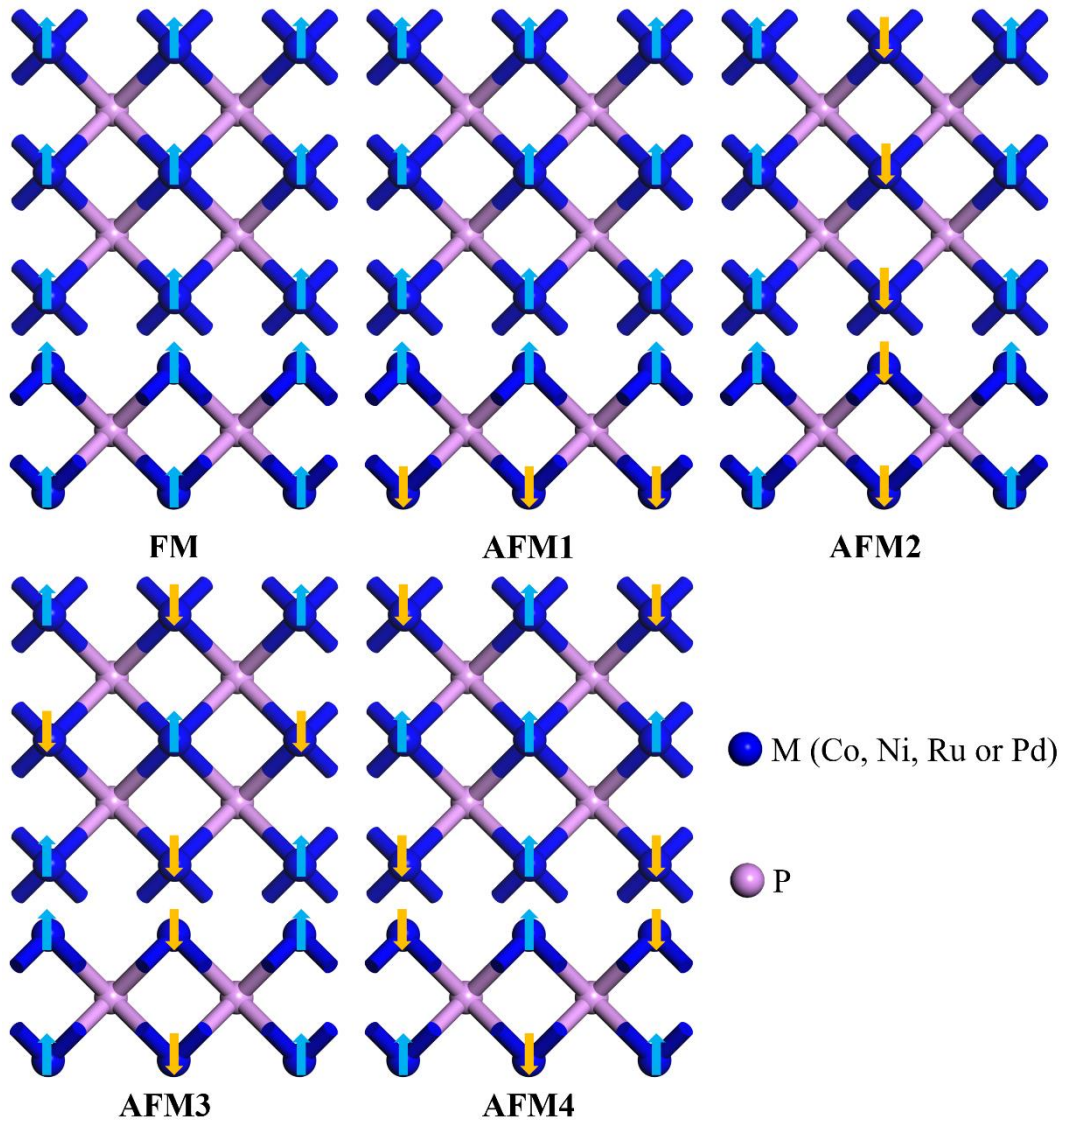

**Fig. S1** Top and side views of five considered magnetic configurations of the tetragonal  $M_2P$  monolayer: (a) ferromagnetic (FM), (b) antiferromagnetic 1 (AFM1), (c) AFM2, (d) AFM3 and (e) AFM4.

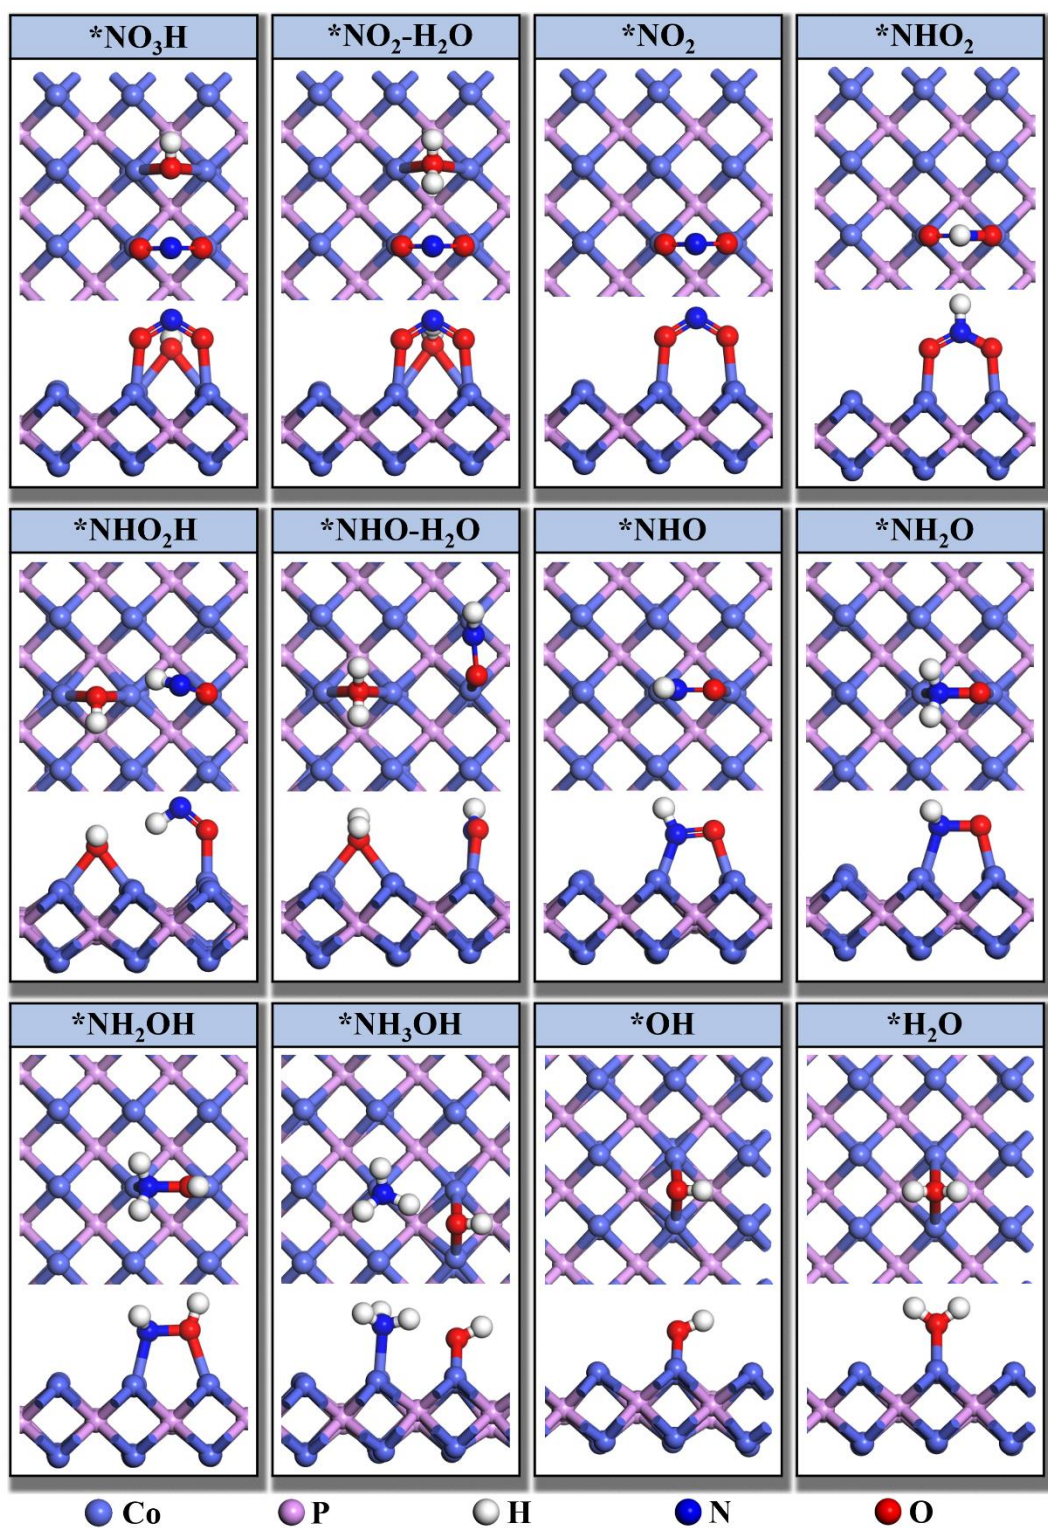

**Fig. S2** Optimized structures of various reaction intermediates along the thermodynamically favorable NO<sub>3</sub>RR pathway on the Co<sub>2</sub>P monolayer.

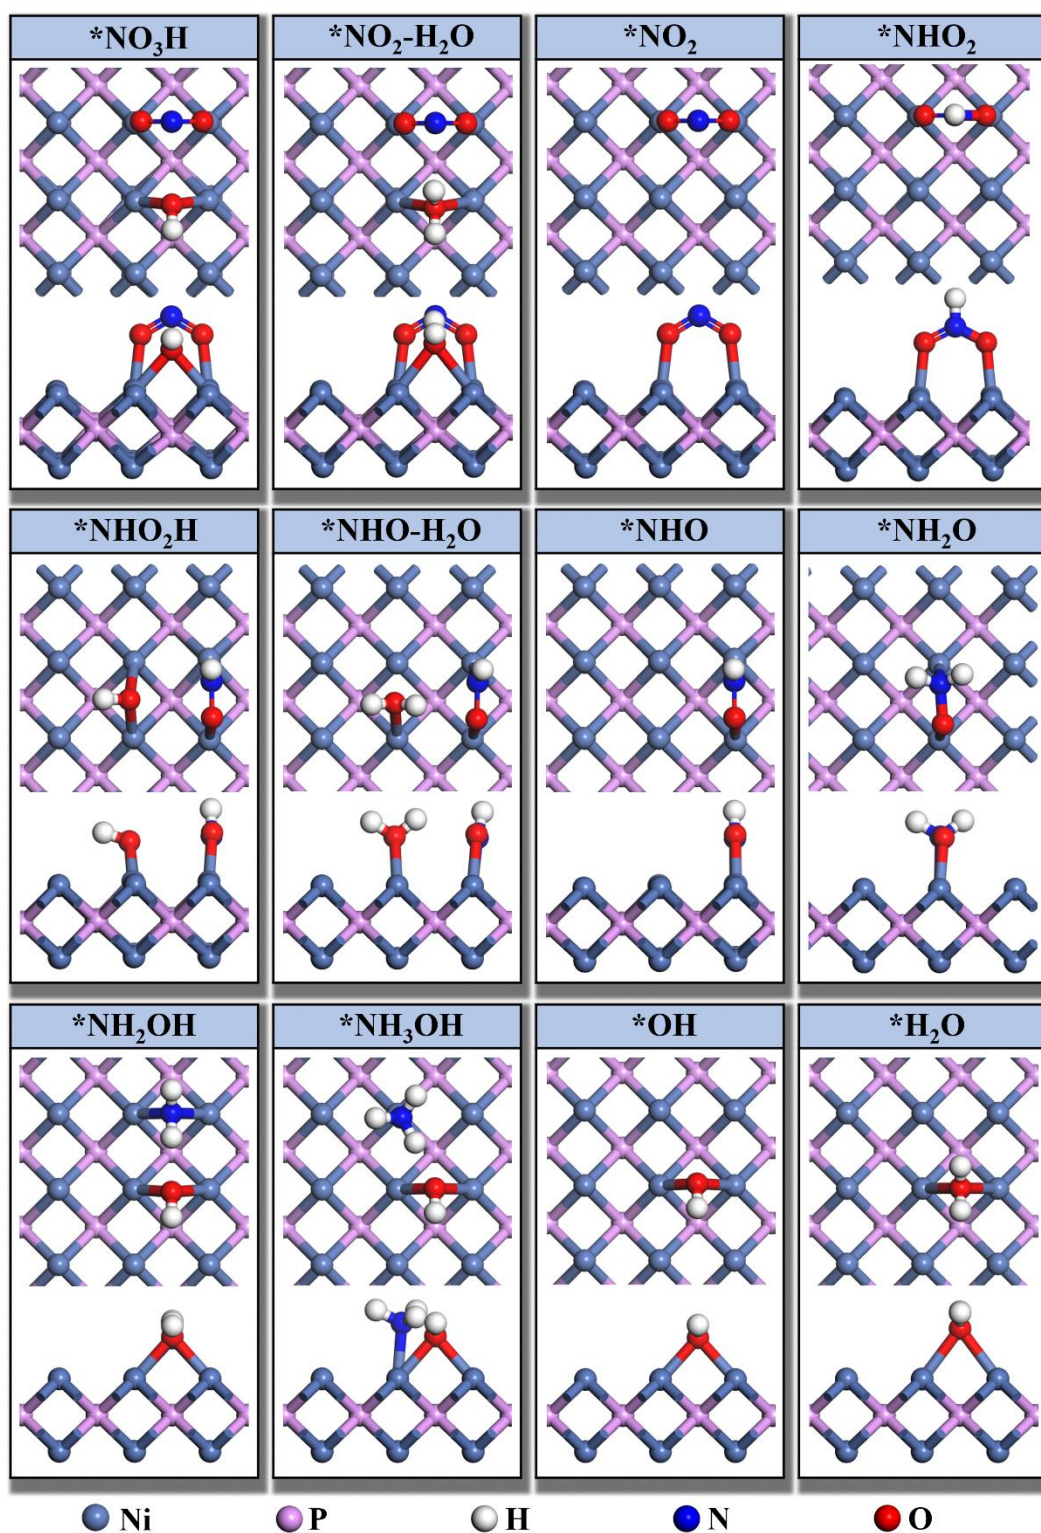

**Fig. S3** Optimized structures of various reaction intermediates along the thermodynamically favorable NO<sub>3</sub>RR pathway on the Ni<sub>2</sub>P monolayer.

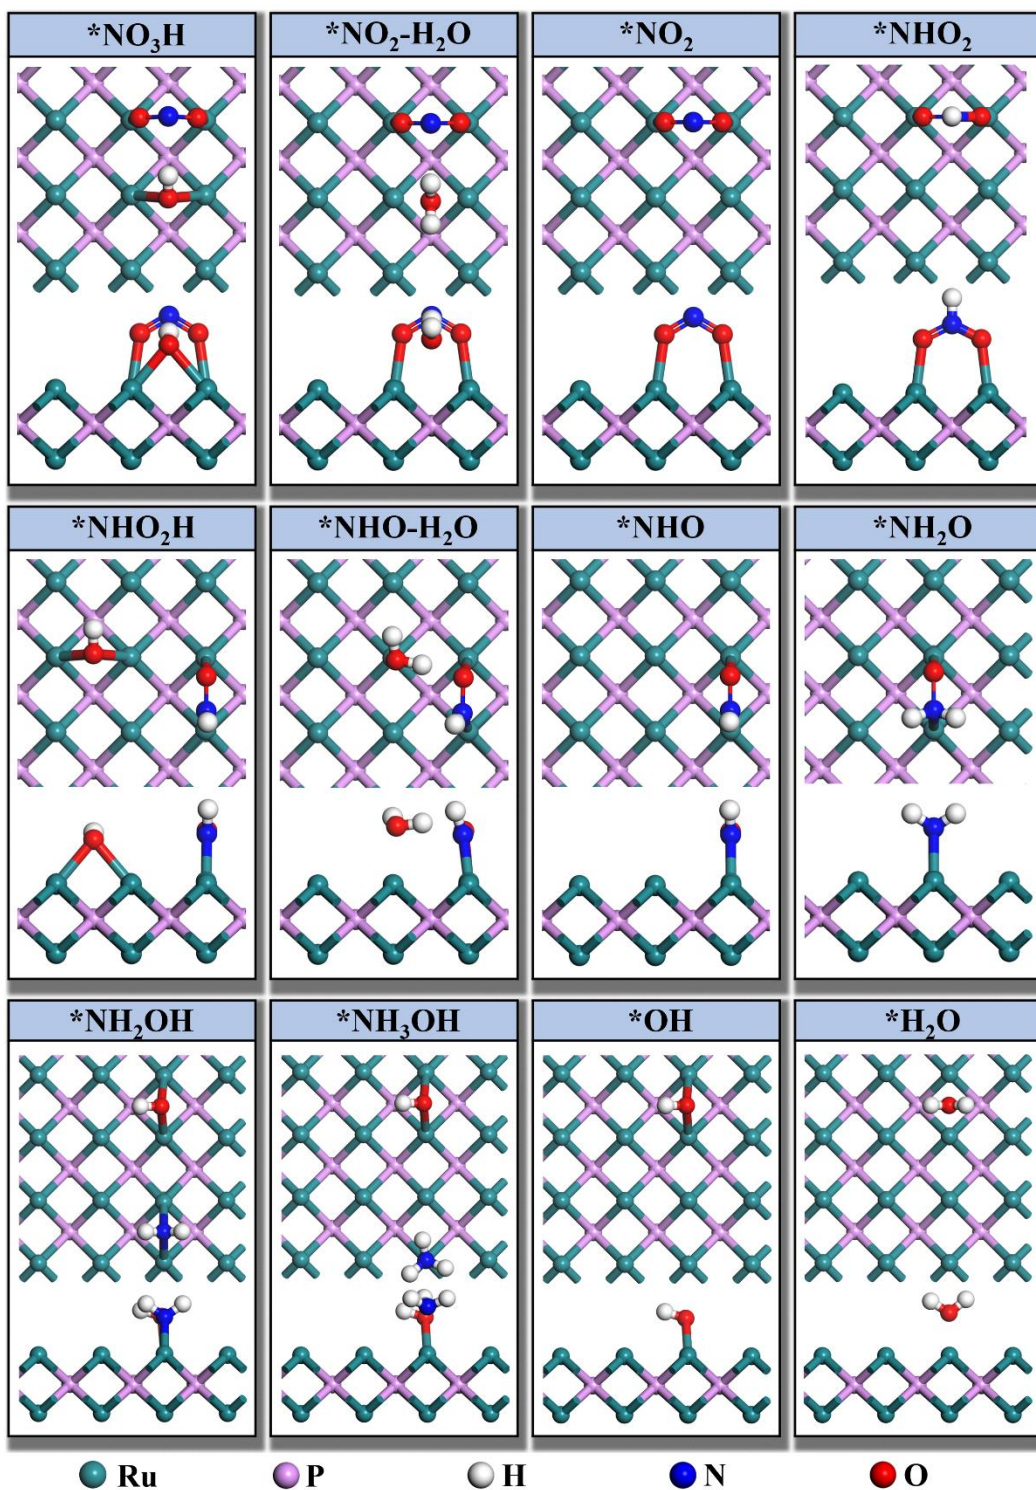

**Fig. S4** Optimized structures of various reaction intermediates along the thermodynamically favorable NO<sub>3</sub>RR pathway on the Ru<sub>2</sub>P monolayer.

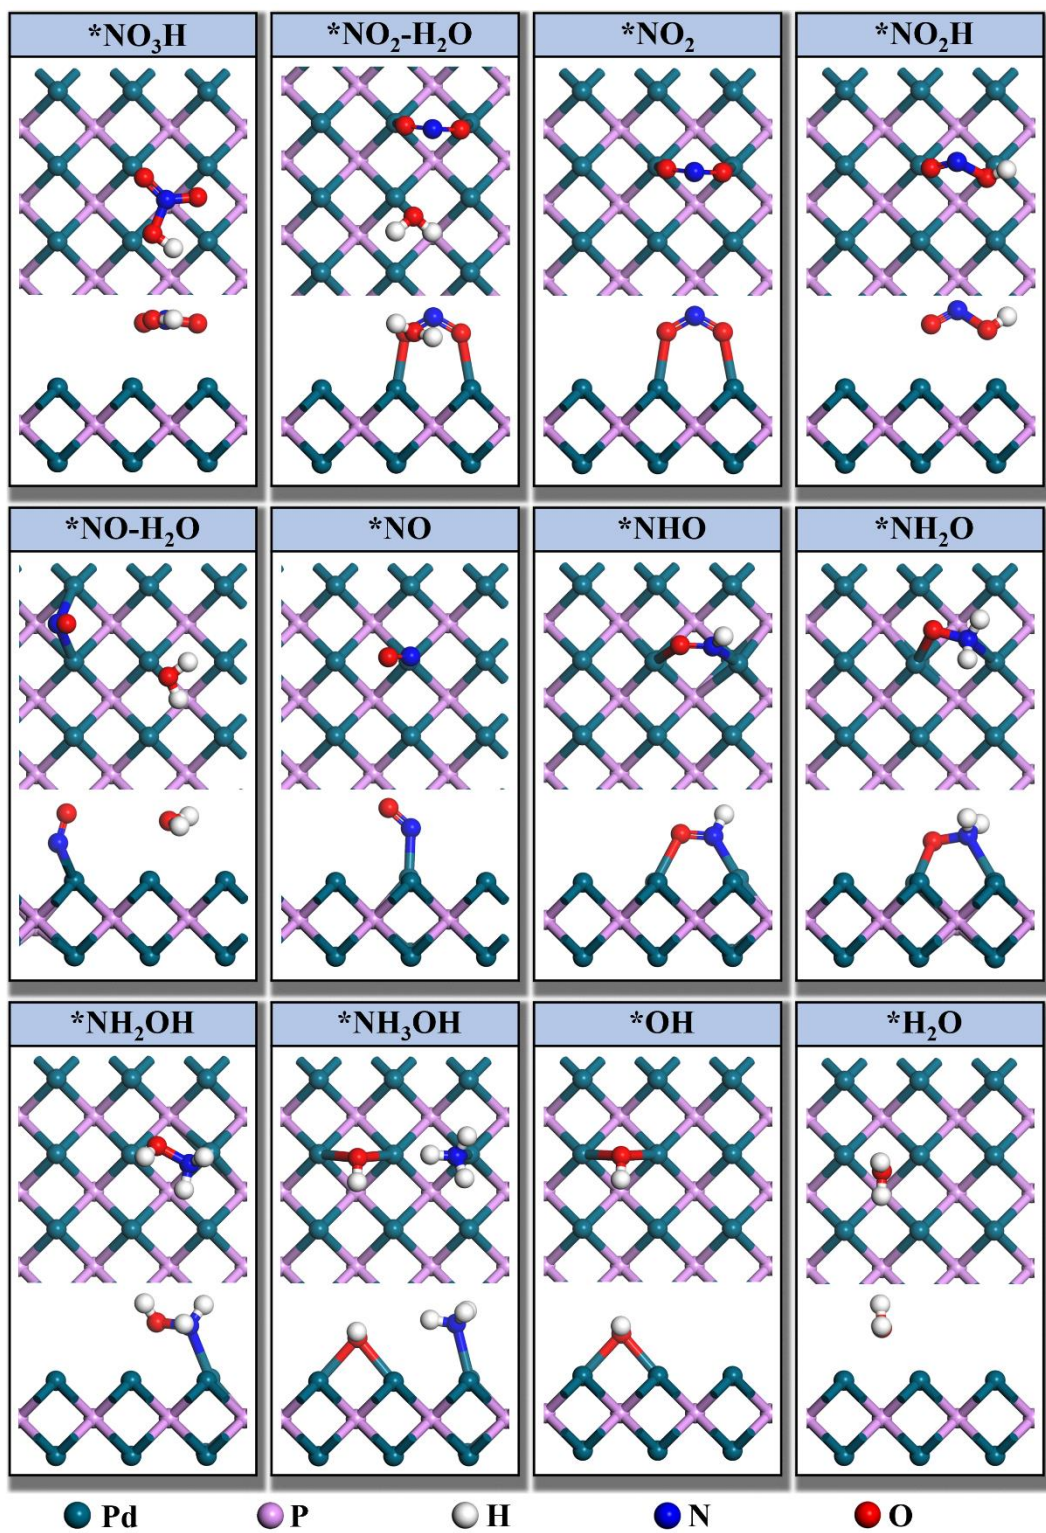

**Fig. S5** Optimized structures of various reaction intermediates along the thermodynamically favorable NO<sub>3</sub>RR pathway on the Pd<sub>2</sub>P monolayer.

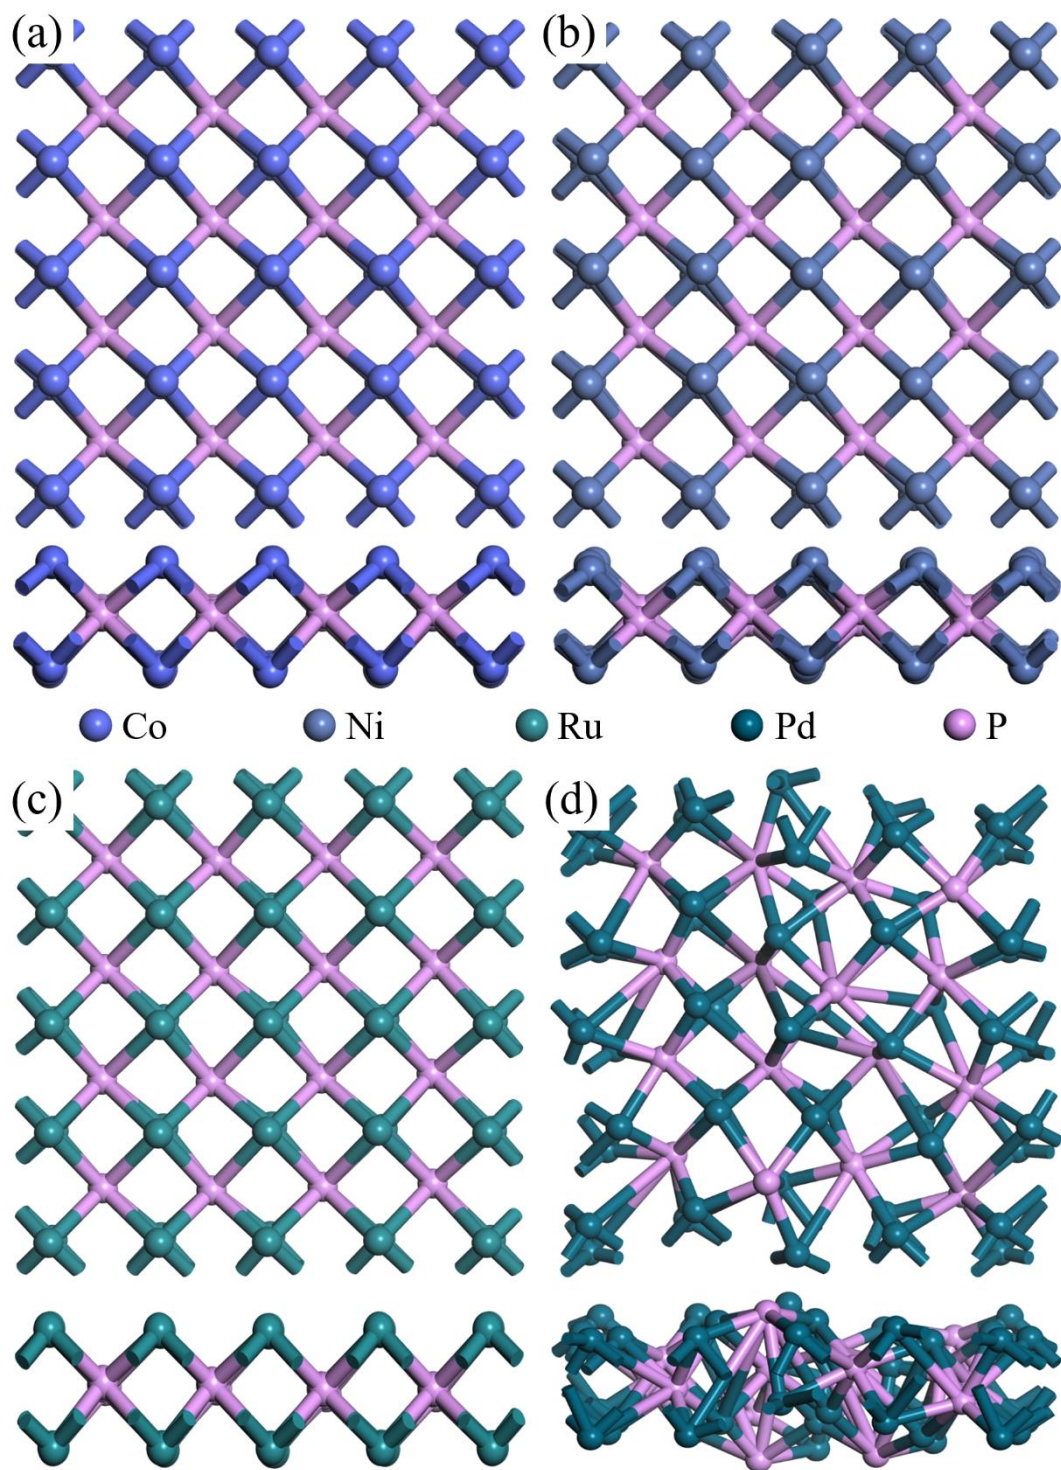

**Fig. S6** Structures of the (a)  $\text{Co}_2\text{P}$ , (b)  $\text{Ni}_2\text{P}$ , (c)  $\text{Ru}_2\text{P}$  and (d)  $\text{Pd}_2\text{P}$  monolayers after AIMD simulations at 300 K for 2 ps with a time step of 1 fs.

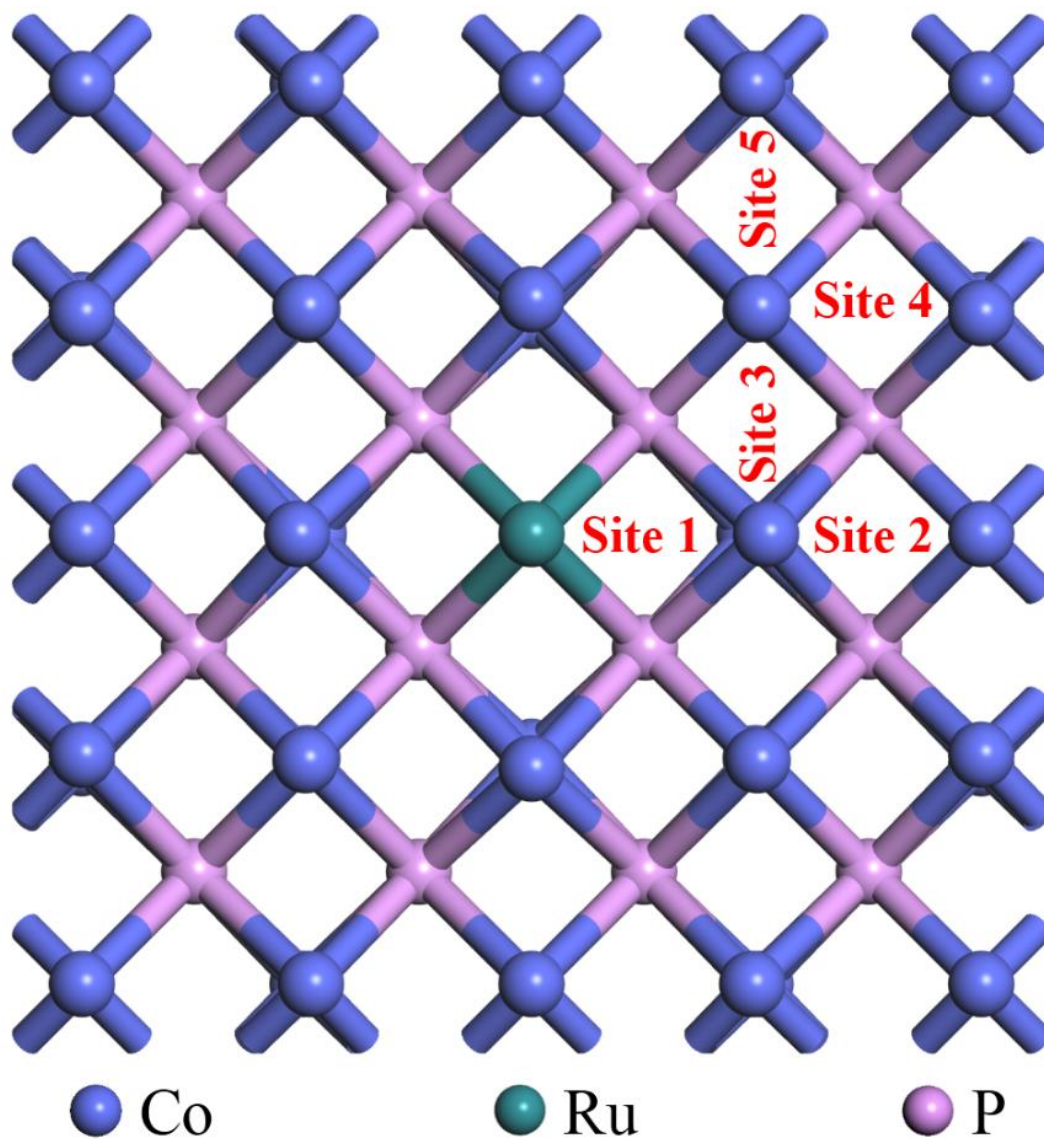

**Fig. S7** Five possible adsorption sites (Site 1, Site 2, Site 3, Site 4 and Site 5) for  $\text{NO}_3^-$  on the Ru-doped  $\text{Co}_2\text{P}$  monolayer.



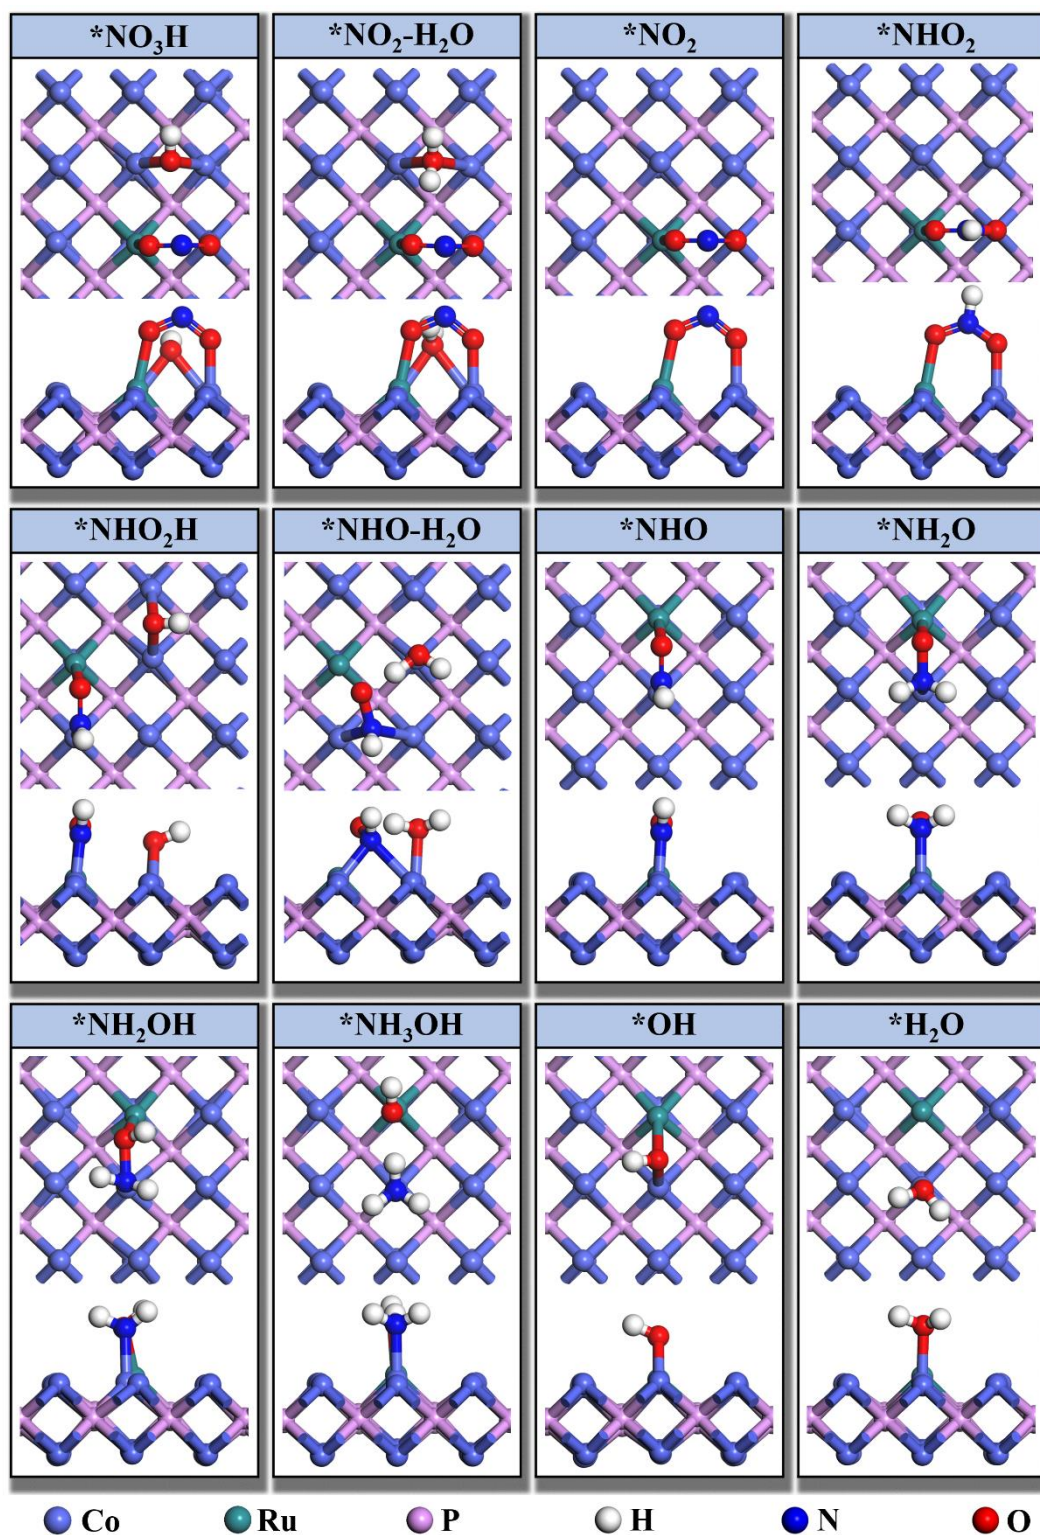

**Fig. S8** Optimized structures of various reaction intermediates along the thermodynamically favorable NO<sub>3</sub>RR pathway on the Ru-doped Co<sub>2</sub>P monolayer.
